# Supplementary material
Source: PubMed Central journal article supplement (PMC3056163)

## Supplemental Materials

### Supplemental Figure 1 (Figure S1) Rac1-T17N and Rac2-T17N specifically inhibit the

**activation of Rac1 and Rac2.** (A) 1  $\mu\text{M}$  Rac1-T17N pretreated human neutrophils in suspension were stimulated by  $1 \times 10^{-7}$  M fMLP. Active Rac1 and Rac2 were detected by PBD pull-down assay (see Materials and Methods). The ratio of active Rac at each time point as compared to time zero was described as  $[\text{Active Rac (time X)}/\text{Total Rac (time X)}] / [\text{Active Rac (0 min)}/\text{Total Rac (0 min)}]$ . Therefore, if the ratio of active Rac to the zero time is 1, it means no activation of Rac. If the ratio is more than 1, it means activation of Rac, and if the ratio is less than 1, it means inhibition of Rac activation. Rac1-T17N treatment decreased Rac1 activation but not Rac2, suggesting Rac1-T17N specifically inhibits Rac1 activation in human neutrophils. (B) 2  $\mu\text{M}$  Rac2-T17N pretreated human neutrophils in suspension were stimulated by  $1 \times 10^{-7}$  M fMLP. The active Rac1 or Rac2 were detected by PBD pull-down assay, and presented as described in (A) above. Rac2-T17N treatment decreased Rac2 activation significantly, but not Rac1 activity, suggesting Rac2-T17N specifically inhibits Rac2 activation in human neutrophils. These concentrations of Tat-GTPases were shown to give optimal inhibition in preliminary dose-response studies, and were used in all chemotaxis experiments. (The result is the representative of two independent experiments)

### Supplemental Figure 2 (Figure S2) Determination of fMLP gradient fields. (A) A

series of fluorescein solutions of known concentration were imaged. (B) Based on the

linear relationship between the concentrations of fluorescein and the fluorescence intensity, a standard curve of fluorescein concentration vs fluorescence intensities was constructed.

(C) A sample image of the gradient field from the micropipette containing  $1 \times 10^{-4}$  M fMLP is shown at 5 min after the addition to the chamber at the top of the panel, and a line scan across the gradient field, as indicated by the red arrow, is shown at the bottom of the panel.

(D) A sample image of the gradient field from the micropipette containing  $1 \times 10^{-5}$  M fMLP is shown at 5 min after the addition to the chamber at the top of the panel, and a line scan across the gradient field, as indicated by the red arrow, is shown at the bottom of the panel.

### **Supplemental Figure 3 (Figure S3) The specificity of the Rac1 and Rac2 antibodies.**

10 ng of recombinant Rac1 or Rac2 were run in separate lanes on a 12% SDS-PAGE gel and then immunoblotted using either Rac1-selective antibody 23A8 (Upstate) or Rac2-specific antibody R786 (in house). (The result is representative of two independent experiments)

### **Supplemental Movie 1-Human neutrophils in high fMLP gradient**

Control, Rac1-T17N and Rac2 T17N treated neutrophils were stimulated with a high fMLP gradient created by a micropipette containing  $3 \times 10^{-4}$  M fMLP. The movie was recorded at 20 s interval.

Note: The micropipette was added at 2 min.

**Supplemental Movie 2-Human neutrophils in low fMLP gradient**

Control, Rac1-T17N and Rac2 T17N treated neutrophils were stimulated with a low fMLP gradient created by a micropipette containing  $3 \times 10^{-5}$  M fMLP. The movie was recorded at 20 s interval.

Note: The micropipette was added at 2 min.

**Supplemental Movie 3 –Behavioral similarity of human neutrophils in gradients of fMLP and uniform fMLP**

The morphological changes of sample human neutrophils, which were subjected to the stimulation of either gradients of fMLP or uniform fMLP, were animated and overlaid with their cell tracks by using DIAS.

**Supplemental Movie 4-Morphological changes of control, Rac1-T17N and Rac2-T17N treated neutrophils in high uniform concentration fMLP**

The morphological changes of control and Rac1-T17N or Rac2-T17N treated neutrophils in high uniform concentration of fMLP were animated and overlaid with their cell tracks by using DIAS.

**Supplemental Movie 5-Morphological changes of control, Src and PI3K inhibitor treated neutrophils in high uniform concentration fMLP**

The morphological changes of control and Src or PI3K inhibitor treated neutrophils in high

uniform concentration of fMLP were animated and overlaid with their cell tracks by using DIAS.

Figure 1

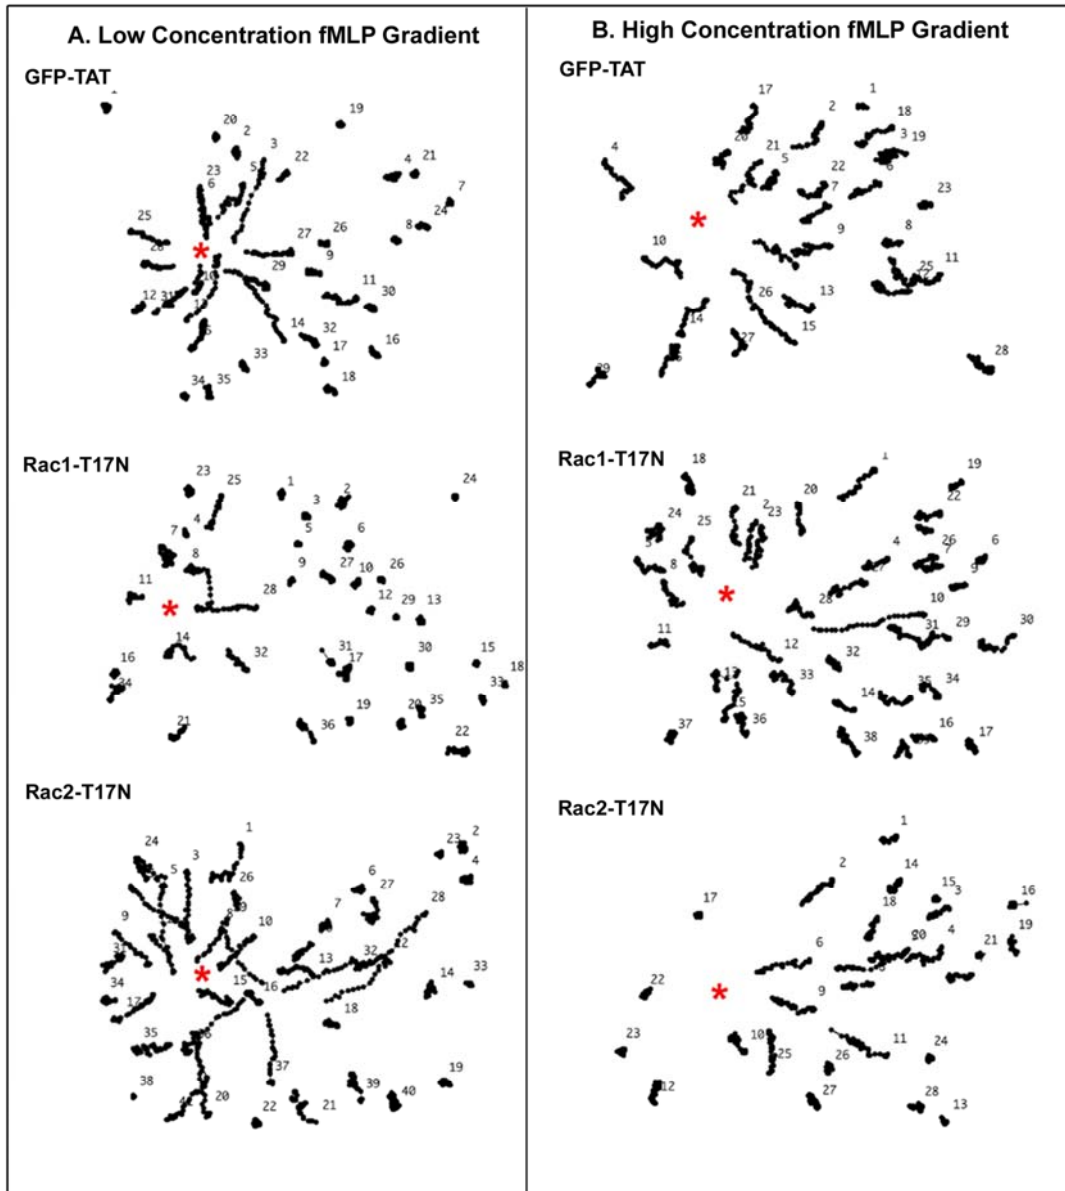

Figure 2

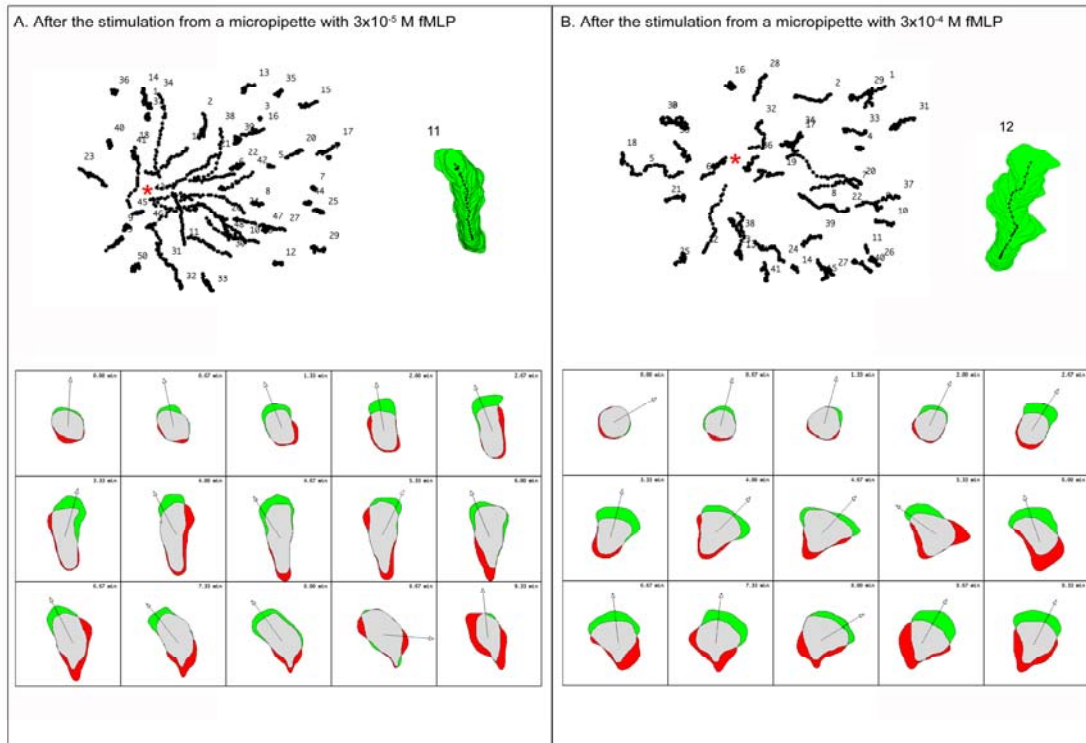

Figure 3

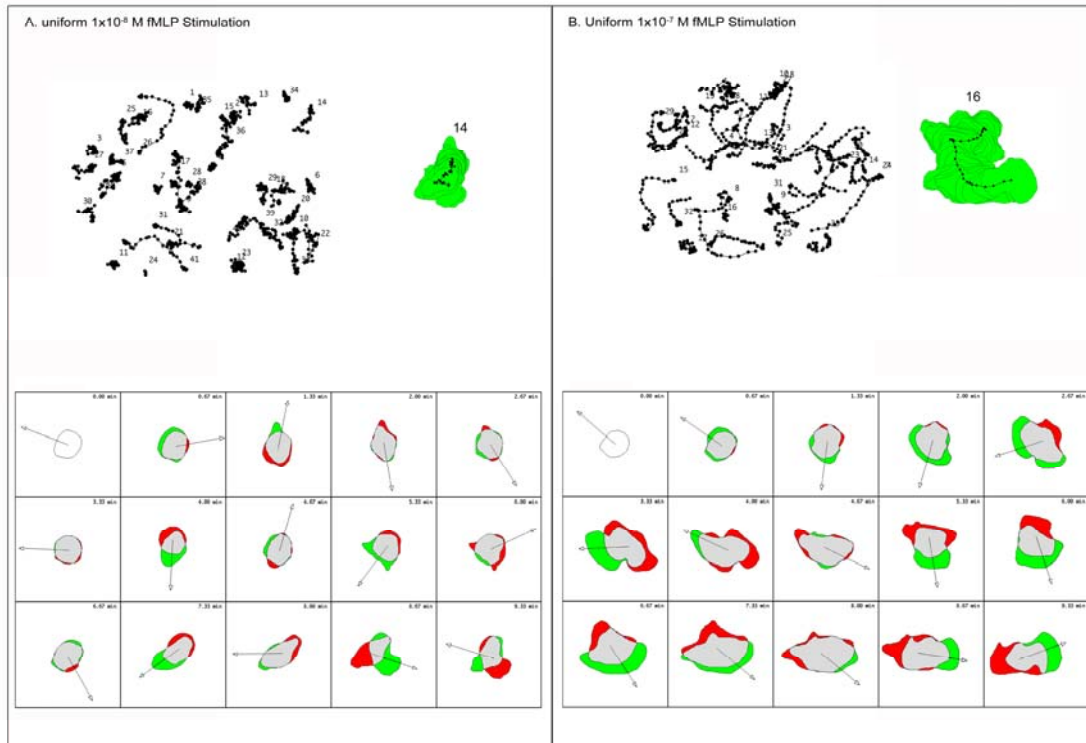

Figure 4

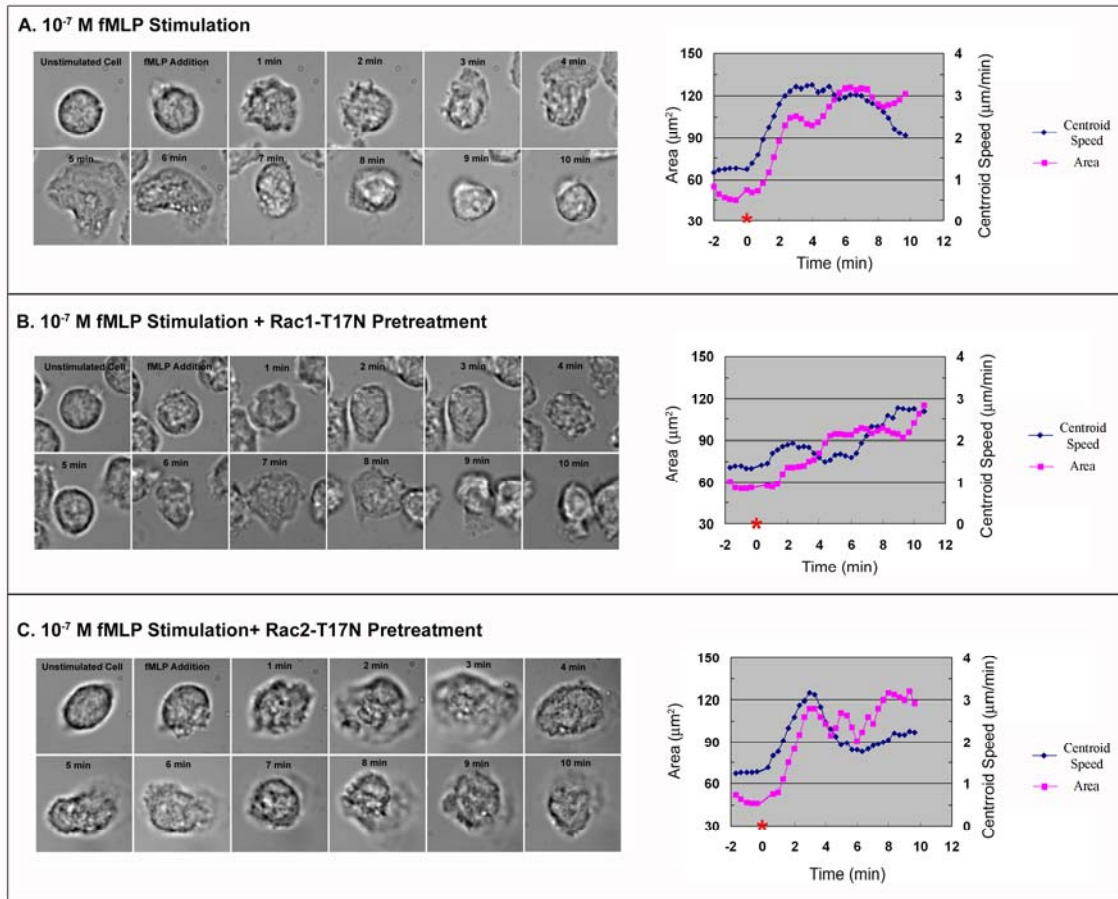



Figure 5

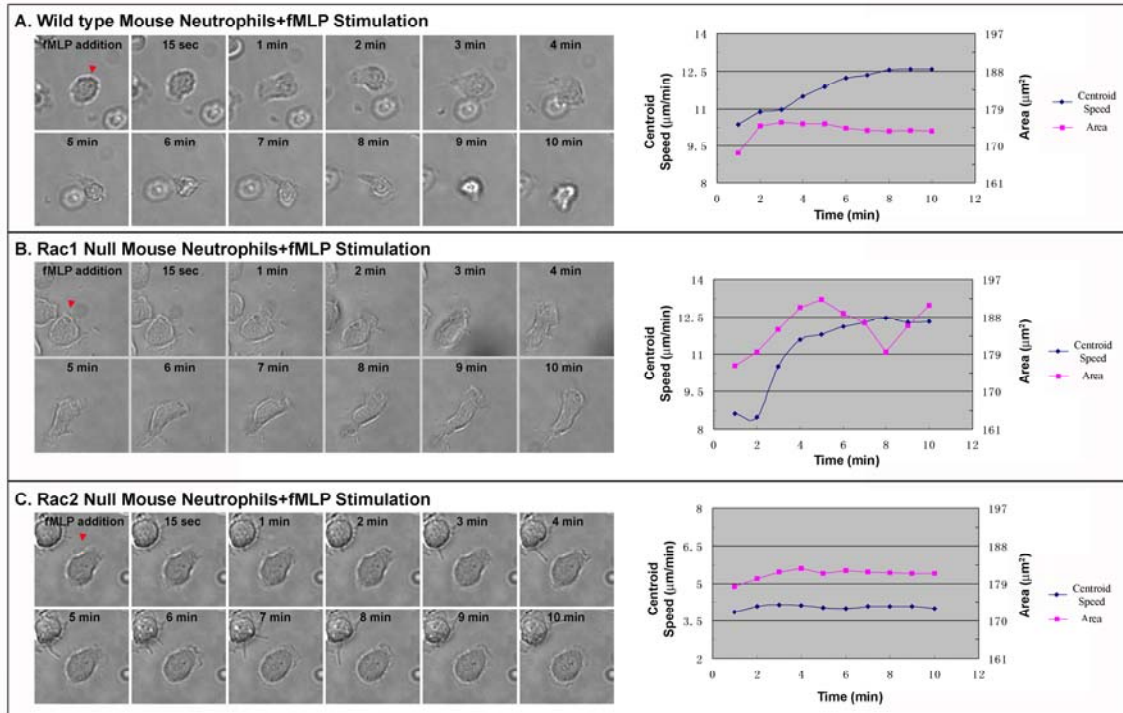

Figure 6

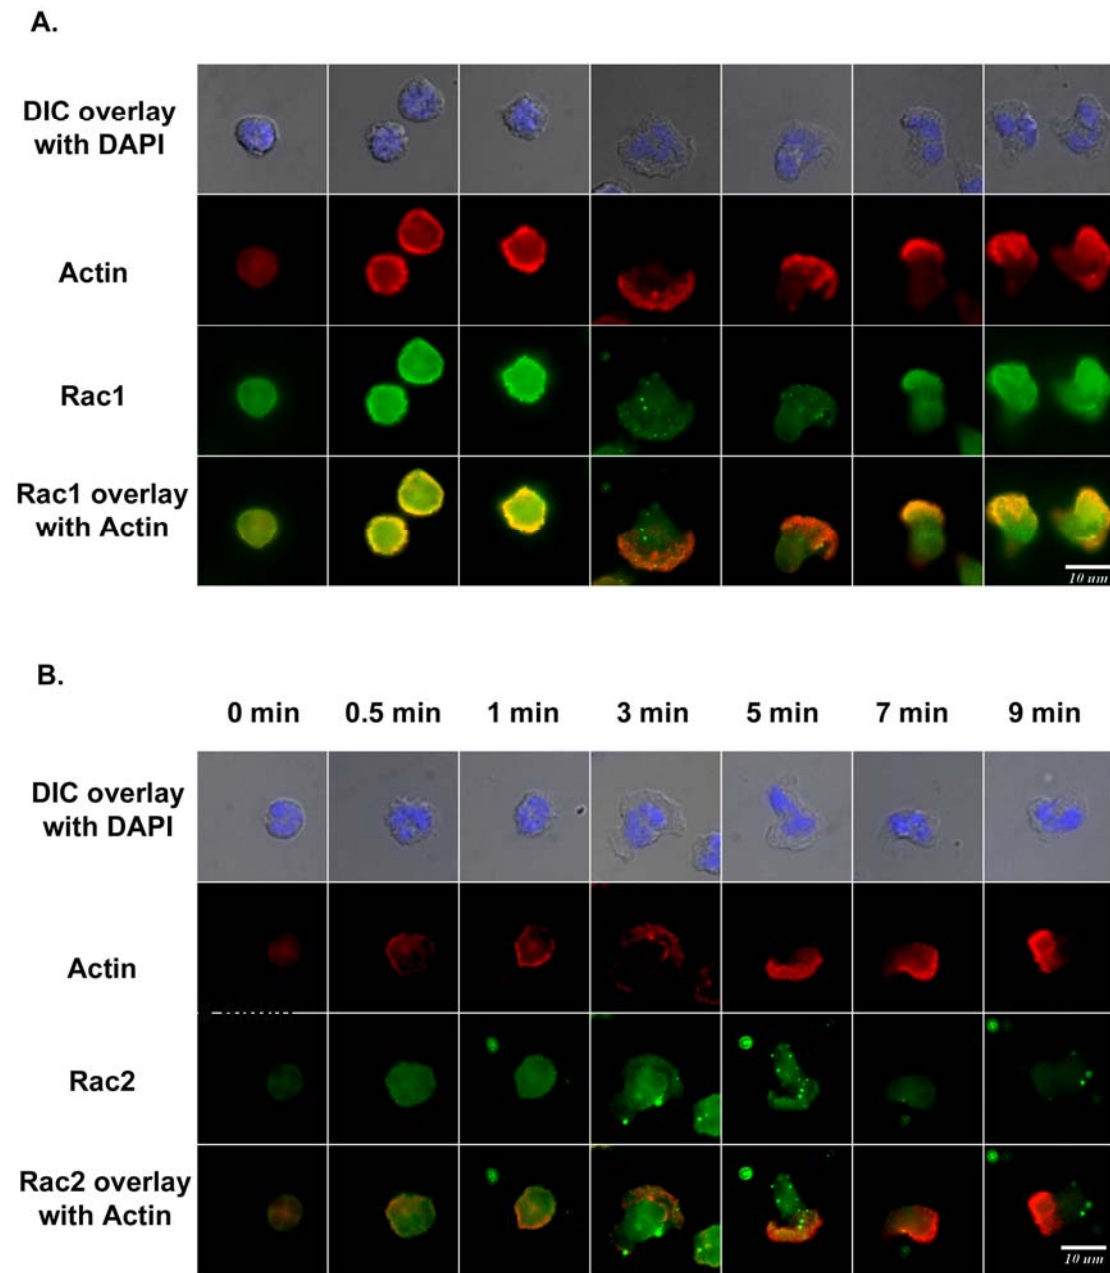

Figure 7

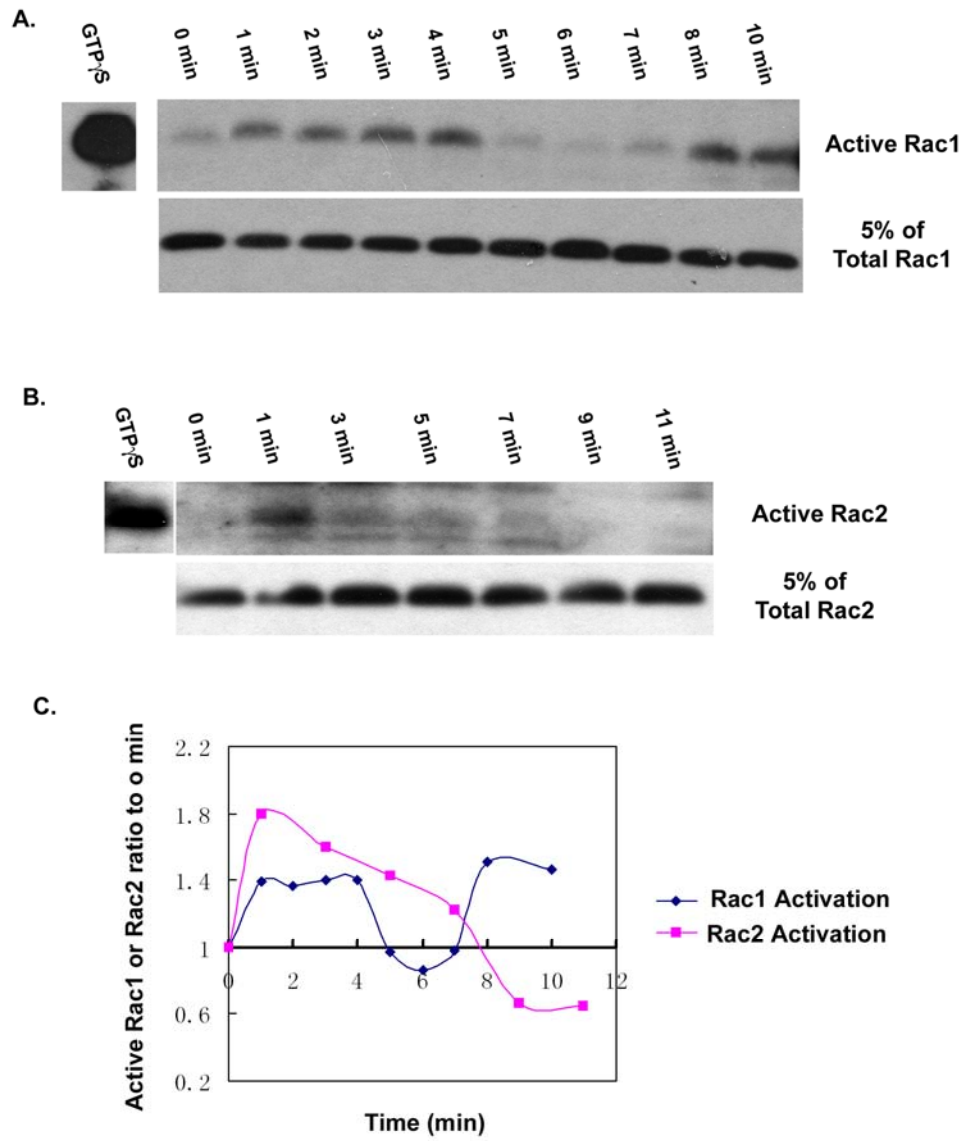

Figure 8

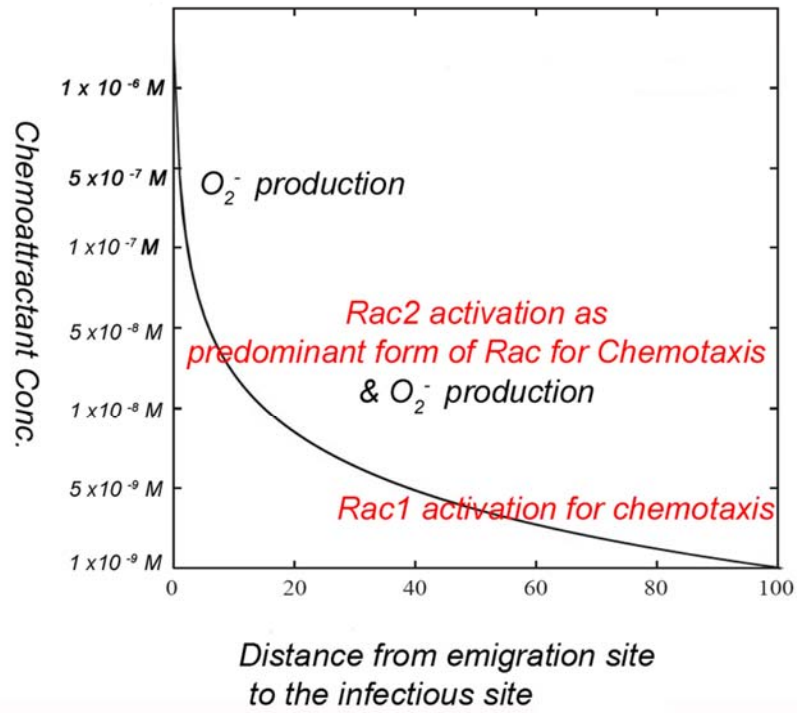

Figure S1

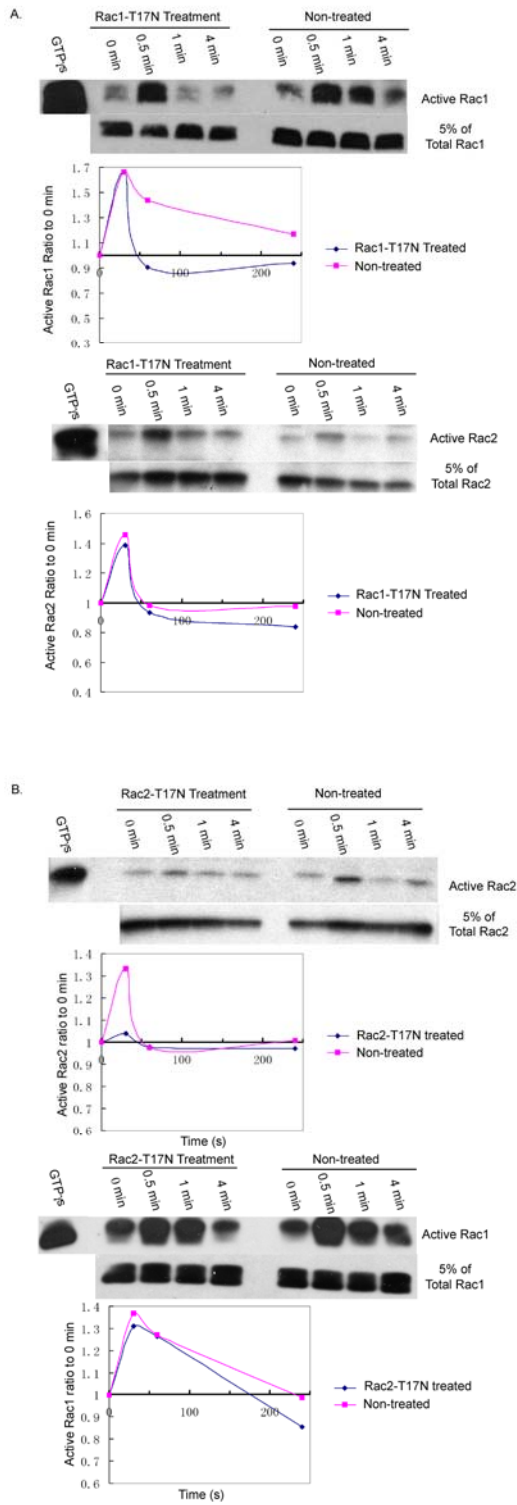

Figure S2

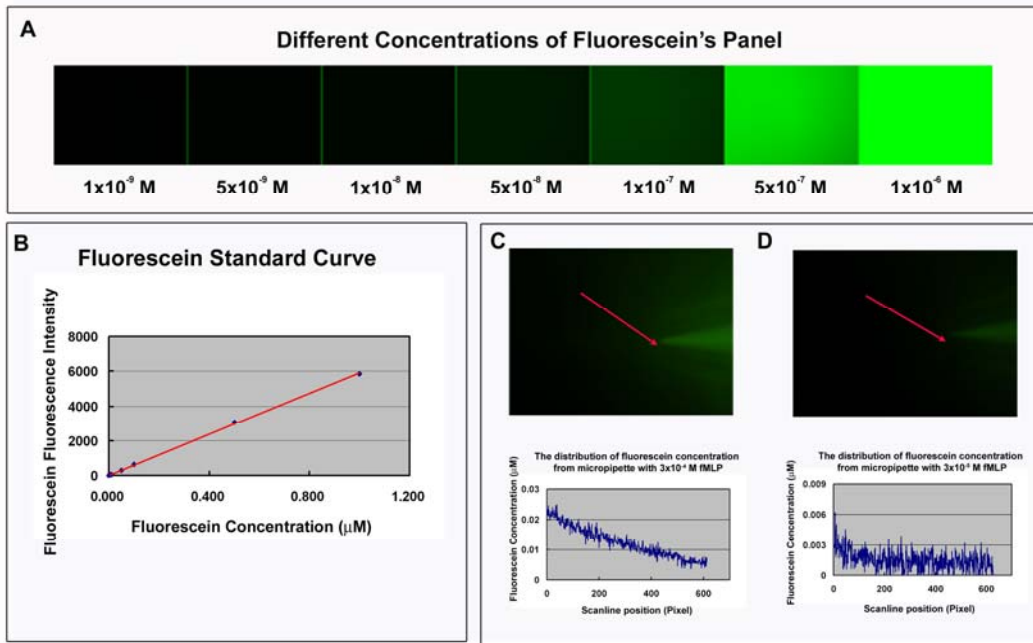

Figure S3

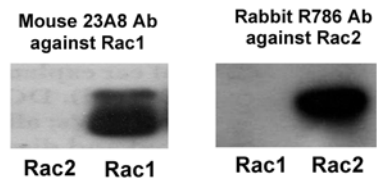

Supplement: NIHMS140134-supplement-Arrays.pdf [file NIHMS140134-supplement-Arrays.pdf]
